# Supplementary material
Source: PubMed Central journal article supplement (PMC5014214)
Supplement: GEPI-39-518-s001.pdf [file GEPI-39-518-s001.pdf]

## Additional Results from Simulation Studies

**Table S1: Simulation Study 1 Genomewide Bootstrap Summary Statistics (significance threshold  $P < 5 \times 10^{-5}$ )** Comparison of the *genomewide bias-reduced bootstrap* and the *naïve* Cox PH estimates for 15 SNPs with MAF  $\geq 5\%$  generated to have association with time to severe nephropathy in a sample of 5444 subjects. The rows are ordered by empirical power which is the proportion of simulated datasets in which the SNP was detected as significant out of 5000 replications. Mean bias is calculated as the difference between the mean fitted logHR in all datasets and the mean logHR in selected datasets.

| SNP<br>MAF | Data<br>generated<br>logHR | Empirical<br>Power<br>(%) | Mean<br>fitted<br>logHR | Mean values for logHR estimates |                          |                  |                            |                                     |                                |
|------------|----------------------------|---------------------------|-------------------------|---------------------------------|--------------------------|------------------|----------------------------|-------------------------------------|--------------------------------|
|            |                            |                           |                         | Uncorrected<br>Naïve            | Genome-wide<br>Bootstrap | Bias in<br>Naïve | Bias in<br>Genome-<br>wide | % reduction<br>of Naïve<br>estimate | No. of<br>datasets<br>selected |
| 10.3       | 0.50                       | 99.5                      | 0.50                    | 0.50                            | 0.43                     | 0.00             | -0.07                      | 15.3                                | 4974                           |
| 34.9       | 0.19                       | 77.3                      | 0.22                    | 0.23                            | 0.18                     | 0.01             | -0.04                      | 24.2                                | 3863                           |
| 26.7*      | 0.22                       | 65.5                      | 0.20                    | 0.23                            | 0.17                     | 0.03             | -0.03                      | 26.4                                | 3275                           |
| 17.1       | 0.17                       | 55.7                      | 0.26                    | 0.30                            | 0.23                     | 0.04             | -0.03                      | 24.3                                | 2785                           |
| 15.0       | 0.13                       | 52.2                      | 0.27                    | 0.31                            | 0.24                     | 0.04             | -0.03                      | 24.2                                | 2611                           |
| 13.7*      | 0.23                       | 50.0                      | 0.22                    | 0.26                            | 0.19                     | 0.04             | -0.03                      | 29.7                                | 2499                           |
| 48.8*      | 0.27                       | 17.2                      | 0.14                    | 0.19                            | 0.14                     | 0.05             | 0.00                       | 29.2                                | 861                            |
| 39.0*      | 0.21                       | 10.0                      | 0.12                    | 0.19                            | 0.13                     | 0.07             | 0.01                       | 30.8                                | 500                            |
| 5.8*       | 0.19                       | 9.3                       | 0.21                    | 0.34                            | 0.23                     | 0.13             | 0.02                       | 34.0                                | 463                            |
| 15.8*      | 0.09                       | 8.9                       | 0.15                    | 0.24                            | 0.16                     | 0.09             | 0.01                       | 31.6                                | 447                            |
| 15.8*      | 0.13                       | 8.4                       | 0.15                    | 0.24                            | 0.16                     | 0.09             | 0.01                       | 31.0                                | 418                            |
| 14.6       | 0.14                       | 0.7                       | 0.12                    | 0.28                            | 0.20                     | 0.16             | 0.08                       | 28.6                                | 36                             |
| 36.3       | 0.14                       | 0.6                       | 0.07                    | 0.19                            | 0.14                     | 0.12             | 0.07                       | 30.0                                | 29                             |
| 6.8        | 0.27                       | 0.2                       | 0.16                    | 0.42                            | 0.31                     | 0.26             | 0.15                       | 26.9                                | 11                             |
| 6.9        | 0.12                       | 0                         | 0.09                    | NA                              | NA                       | NA               | NA                         | NA                                  | 0                              |

\* minor allele is the risk allele, otherwise major allele is associated with risk

**Table S2: Simulation Study 1 Conditional Likelihood Summary Statistics (significance threshold  $P < 5 \times 10^{-5}$ )** Comparison of the Ghosh et al *conditional likelihood* and the *naïve* Cox PH estimates for 15 SNPs with MAF  $\geq 5\%$  generated to have association with time to severe nephropathy in a sample of 5444 subjects. The rows are ordered by empirical power which is the proportion of simulation datasets in which the SNP was detected as significant out of the 5000 replications. Mean bias is calculated as the difference between the mean fitted logHR in all datasets and the mean logHR in selected datasets.

| SNP<br>MAF | Data<br>generated<br>logHR | Empirical<br>Power<br>(%) | Mean<br>fitted<br>logHR | Mean values for logHR estimates |                           |                  |                       |                                     |                                |
|------------|----------------------------|---------------------------|-------------------------|---------------------------------|---------------------------|------------------|-----------------------|-------------------------------------|--------------------------------|
|            |                            |                           |                         | Uncorrected<br>Naïve            | Conditional<br>Likelihood | Bias in<br>Naïve | Bias in<br>Likelihood | % reduction<br>of Naïve<br>estimate | No. of<br>datasets<br>selected |
| 10.3       | 0.50                       | 99.5                      | 0.50                    | 0.50                            | 0.50                      | 0.00             | 0.00                  | 0.4                                 | 4974                           |
| 34.9       | 0.19                       | 77.3                      | 0.22                    | 0.23                            | 0.23                      | 0.01             | 0.01                  | 2.2                                 | 3863                           |
| 26.7*      | 0.22                       | 65.5                      | 0.20                    | 0.23                            | 0.22                      | 0.03             | 0.02                  | 2.4                                 | 3275                           |
| 17.1       | 0.17                       | 55.7                      | 0.26                    | 0.30                            | 0.29                      | 0.04             | 0.03                  | 3.0                                 | 2785                           |
| 15.0       | 0.13                       | 52.2                      | 0.27                    | 0.31                            | 0.30                      | 0.04             | 0.03                  | 3.2                                 | 2611                           |
| 13.7*      | 0.23                       | 50.0                      | 0.22                    | 0.26                            | 0.25                      | 0.04             | 0.03                  | 2.9                                 | 2499                           |
| 48.8*      | 0.27                       | 17.2                      | 0.14                    | 0.19                            | 0.18                      | 0.05             | 0.04                  | 4.2                                 | 861                            |
| 39.0*      | 0.21                       | 10.0                      | 0.12                    | 0.19                            | 0.18                      | 0.07             | 0.06                  | 4.4                                 | 500                            |
| 5.8*       | 0.19                       | 9.3                       | 0.21                    | 0.34                            | 0.33                      | 0.13             | 0.12                  | 4.1                                 | 463                            |
| 15.8*      | 0.09                       | 8.9                       | 0.15                    | 0.24                            | 0.23                      | 0.09             | 0.08                  | 3.9                                 | 447                            |
| 15.8*      | 0.13                       | 8.4                       | 0.15                    | 0.24                            | 0.23                      | 0.09             | 0.08                  | 4.0                                 | 418                            |
| 14.6       | 0.14                       | 0.7                       | 0.12                    | 0.28                            | 0.27                      | 0.16             | 0.15                  | 4.9                                 | 36                             |
| 36.3       | 0.14                       | 0.6                       | 0.07                    | 0.19                            | 0.18                      | 0.12             | 0.11                  | 4.6                                 | 29                             |
| 6.8        | 0.27                       | 0.2                       | 0.16                    | 0.42                            | 0.39                      | 0.26             | 0.23                  | 6.1                                 | 11                             |
| 6.9        | 0.12                       | 0                         | 0.09                    | NA                              | NA                        | NA               | NA                    | NA                                  | 0                              |

\* minor allele is the risk allele, otherwise major allele is associated with risk

**Table S3: Simulation Study 1 Single-SNP Bootstrap Summary Statistics (significance threshold  $P < 5 \times 10^{-5}$ )** Comparison of the *single-SNP bias-reduced bootstrap* and the *naïve* Cox PH estimates for 15 SNPs with  $MAF \geq 5\%$  generated to have association with time to severe nephropathy in a sample of 5444 subjects. The rows are ordered by empirical power which is the proportion of simulation datasets in which the SNP was detected as significant out of the 5000 replications. Mean bias is calculated as the difference between the mean fitted logHR in all datasets and the mean logHR in selected datasets.

| SNP<br>MAF | Data<br>generated<br>logHR | Empirical<br>Power<br>(%) | Mean<br>fitted<br>logHR | Mean values for logHR estimates |                         |                  |                       |                                     |                                |
|------------|----------------------------|---------------------------|-------------------------|---------------------------------|-------------------------|------------------|-----------------------|-------------------------------------|--------------------------------|
|            |                            |                           |                         | Uncorrected<br>Naïve            | Single SNP<br>Bootstrap | Bias in<br>Naïve | Bias in<br>Single-SNP | % reduction<br>of Naïve<br>estimate | No. of<br>datasets<br>selected |
| 10.3       | 0.50                       | 99.5                      | 0.50                    | 0.50                            | 0.50                    | 0.00             | 0.00                  | 2.4                                 | 4974                           |
| 34.9       | 0.19                       | 77.3                      | 0.22                    | 0.23                            | 0.22                    | 0.01             | 0.00                  | 7.5                                 | 3863                           |
| 26.7*      | 0.22                       | 65.5                      | 0.20                    | 0.23                            | 0.21                    | 0.03             | 0.01                  | 9.1                                 | 3275                           |
| 17.1       | 0.17                       | 55.7                      | 0.26                    | 0.3                             | 0.27                    | 0.04             | 0.01                  | 9.0                                 | 2785                           |
| 15.0       | 0.13                       | 52.2                      | 0.27                    | 0.31                            | 0.29                    | 0.04             | 0.02                  | 9.1                                 | 2611                           |
| 13.7*      | 0.23                       | 50.0                      | 0.22                    | 0.26                            | 0.24                    | 0.04             | 0.02                  | 10.2                                | 2499                           |
| 48.8*      | 0.27                       | 17.2                      | 0.14                    | 0.19                            | 0.17                    | 0.05             | 0.03                  | 12.6                                | 861                            |
| 39.0*      | 0.21                       | 10.0                      | 0.12                    | 0.19                            | 0.16                    | 0.07             | 0.04                  | 12.7                                | 500                            |
| 5.8*       | 0.19                       | 9.3                       | 0.21                    | 0.34                            | 0.30                    | 0.13             | 0.09                  | 14.2                                | 463                            |
| 15.8*      | 0.09                       | 8.9                       | 0.15                    | 0.24                            | 0.21                    | 0.09             | 0.06                  | 13.1                                | 447                            |
| 15.8*      | 0.13                       | 8.4                       | 0.15                    | 0.24                            | 0.21                    | 0.09             | 0.06                  | 13.1                                | 418                            |
| 14.6       | 0.14                       | 0.7                       | 0.12                    | 0.28                            | 0.25                    | 0.16             | 0.13                  | 12.6                                | 36                             |
| 36.3       | 0.14                       | 0.6                       | 0.07                    | 0.19                            | 0.17                    | 0.12             | 0.10                  | 13.4                                | 29                             |
| 6.8        | 0.27                       | 0.2                       | 0.16                    | 0.42                            | 0.35                    | 0.26             | 0.19                  | 16.7                                | 11                             |
| 6.9        | 0.12                       | 0                         | 0.09                    | NA                              | NA                      | NA               | NA                    | NA                                  | 0                              |

\* minor allele is the risk allele, otherwise major allele is associated with risk

**Table S4: Simulation Study 2 Genomewide Bootstrap Summary Statistics (significance threshold  $P < 0.01$ )** Comparison of the *genomewide bias-reduced bootstrap* and the *naïve* Cox PH estimates for 15 SNPs with  $MAF \geq 5\%$  generated to have association with time to severe nephropathy in a sample of 5444 subjects. The rows are ordered by empirical power which is the proportion of simulation datasets in which the SNP was detected as significant out of 5000 replications. Mean bias is calculated as the difference between the mean fitted logHR in all datasets and the mean logHR in selected datasets.

| SNP<br>MAF | Data<br>generated<br>logHR | Empirical<br>Power<br>(%) | Mean<br>fitted<br>logHR | Mean values for log(HR) estimates |                              |                  |                            |                                     |                                |
|------------|----------------------------|---------------------------|-------------------------|-----------------------------------|------------------------------|------------------|----------------------------|-------------------------------------|--------------------------------|
|            |                            |                           |                         | Uncorrected<br>Naïve              | Genome-<br>wide<br>Bootstrap | Bias in<br>Naïve | Bias in<br>Genome<br>-wide | % reduction<br>of Naïve<br>estimate | No. of<br>datasets<br>selected |
| 10.3       | 0.50                       | 100                       | 0.50                    | 0.50                              | 0.42                         | 0.00             | -0.08                      | 15.5                                | 5000                           |
| 34.9       | 0.19                       | 99.1                      | 0.22                    | 0.22                              | 0.16                         | 0.00             | -0.06                      | 27.4                                | 4953                           |
| 26.7*      | 0.22                       | 97.6                      | 0.20                    | 0.21                              | 0.15                         | 0.01             | -0.05                      | 31.2                                | 4882                           |
| 17.1       | 0.17                       | 96.9                      | 0.26                    | 0.26                              | 0.19                         | 0.00             | -0.07                      | 29.8                                | 4845                           |
| 15.0       | 0.13                       | 96.5                      | 0.27                    | 0.27                              | 0.19                         | 0.00             | -0.08                      | 30.2                                | 4824                           |
| 13.7*      | 0.23                       | 93.7                      | 0.22                    | 0.23                              | 0.15                         | 0.01             | -0.07                      | 36.7                                | 4685                           |
| 48.8*      | 0.27                       | 75.4                      | 0.14                    | 0.15                              | 0.09                         | 0.02             | -0.04                      | 39.1                                | 3772                           |
| 39.0*      | 0.21                       | 66.0                      | 0.12                    | 0.14                              | 0.08                         | 0.02             | -0.04                      | 42.2                                | 3300                           |
| 5.8*       | 0.09                       | 58.5                      | 0.15                    | 0.18                              | 0.10                         | 0.03             | -0.05                      | 44.1                                | 2923                           |
| 15.8*      | 0.13                       | 56.7                      | 0.15                    | 0.18                              | 0.10                         | 0.03             | -0.05                      | 44.1                                | 2834                           |
| 15.8*      | 0.19                       | 54.3                      | 0.21                    | 0.27                              | 0.15                         | 0.06             | -0.06                      | 46.7                                | 2714                           |
| 14.6       | 0.14                       | 24.0                      | 0.12                    | 0.19                              | 0.11                         | 0.07             | -0.01                      | 41.9                                | 1198                           |
| 36.3       | 0.14                       | 18.6                      | 0.07                    | 0.13                              | 0.07                         | 0.06             | 0.0                        | 44.9                                | 929                            |
| 6.8        | 0.27                       | 15.1                      | 0.16                    | 0.29                              | 0.17                         | 0.13             | 0.01                       | 40.1                                | 755                            |
| 6.9        | 0.12                       | 4.3                       | 0.09                    | 0.27                              | 0.15                         | 0.18             | 0.06                       | 42.3                                | 215                            |

\* minor allele is the risk allele, otherwise major allele is associated with risk

**Table S5: Simulation Study 3 Genomewide Bootstrap Summary Statistics (significance threshold  $P < 5 \times 10^{-5}$ )** Comparison of the *genomewide bias-reduced bootstrap* method and the *naïve* Cox PH method for 15 SNPs with MAF  $\geq 5\%$  generated to have association with time to severe nephropathy in either direction in a sample of 5444 subjects. The rows are ordered by empirical power which is the number of simulation datasets in which the SNP was detected as significant ( $p < 5 \times 10^{-5}$ ) out of the 5000 replications. Mean bias is calculated as the difference between the mean fitted logHR in all datasets and the mean logHR in selected datasets.

| SNP<br>MAF | Data<br>generated<br>logHR | Empirical<br>Power<br>(%) | Mean<br>fitted<br>logHR | Mean values for log(HR) estimates |                              |                  |                            |                                     |                                |
|------------|----------------------------|---------------------------|-------------------------|-----------------------------------|------------------------------|------------------|----------------------------|-------------------------------------|--------------------------------|
|            |                            |                           |                         | Uncorrected<br>Naive              | Genome-<br>wide<br>Bootstrap | Bias in<br>Naïve | Bias in<br>Genome<br>-wide | % reduction<br>of Naive<br>estimate | No. of<br>datasets<br>selected |
| 48.8       | 0.27                       | 99.8                      | 0.37                    | 0.37                              | 0.33                         | 0.00             | -0.04                      | 11.5                                | 4989                           |
| 10.3*      | 0.50                       | 98.5                      | 0.45                    | 0.45                              | 0.38                         | 0.00             | -0.07                      | 15.7                                | 4924                           |
| 39.0       | 0.21                       | 72.0                      | 0.25                    | 0.28                              | 0.22                         | 0.03             | -0.03                      | 21.2                                | 3599                           |
| 13.7*      | 0.23                       | 59.5                      | 0.29                    | 0.33                              | 0.25                         | 0.04             | -0.04                      | 25.2                                | 2977                           |
| 17.1       | 0.17                       | 24.4                      | 0.27                    | 0.37                              | 0.29                         | 0.10             | 0.02                       | 22.2                                | 1219                           |
| 15.0       | 0.13                       | 24.0                      | 0.29                    | 0.39                              | 0.31                         | 0.10             | 0.02                       | 22.0                                | 1199                           |
| 26.7       | 0.22                       | 20.6                      | 0.21                    | 0.29                              | 0.22                         | 0.08             | 0.01                       | 23.9                                | 1031                           |
| 15.8*      | 0.09                       | 17.4                      | 0.21                    | 0.30                              | 0.22                         | 0.09             | 0.01                       | 27.0                                | 870                            |
| 15.8*      | 0.13                       | 16.0                      | 0.20                    | 0.30                              | 0.22                         | 0.10             | 0.02                       | 27.6                                | 799                            |
| 5.8*       | 0.19                       | 2.9                       | 0.20                    | 0.41                              | 0.28                         | 0.21             | 0.08                       | 32.1                                | 147                            |
| 36.3       | 0.14                       | 1.0                       | 0.11                    | 0.24                              | 0.18                         | 0.13             | 0.07                       | 26.3                                | 48                             |
| 34.9*      | 0.19                       | 0.1                       | 0.06                    | 0.24                              | 0.18                         | 0.18             | 0.12                       | 27.4                                | 5                              |
| 6.8        | 0.27                       | 0.02                      | 0.09                    | 0.57                              | 0.45                         | 0.48             | 0.36                       | 20.9                                | 1                              |
| 14.6       | 0.14                       | 0.0                       | 0.07                    | NA                                | NA                           | NA               | NA                         | NA                                  | 0                              |
| 6.9        | 0.12                       | 0.0                       | 0.04                    | NA                                | NA                           | NA               | NA                         | NA                                  | 0                              |

\* minor allele is the risk allele, otherwise major allele is associated with risk

## Supplemental Figures:

Figure S3: Simulation Study 1 Conditional Likelihood Estimates for True Positive SNPs (significance threshold  $P < 5 \times 10^{-5}$ )

Figure S4: Simulation Study 1 Conditional Likelihood Estimates for False Positive SNPs (significance threshold  $P < 5 \times 10^{-5}$ )

Figure S5: Simulation Study 1 Genomewide Bootstrap and Conditional Likelihood Estimates for True Positive SNPs (significance threshold  $P < 5 \times 10^{-5}$ )

Figure S6: Simulation Study 1 Genomewide Bootstrap and Conditional Likelihood Estimates for False Positive SNPs (significance threshold  $P < 5 \times 10^{-5}$ )

Figure S7: Simulation Study 1 Single-SNP Bootstrap Estimates for True Positive SNPs (significant threshold  $P < 5 \times 10^{-5}$ )

Figure S8: Simulation Study 1 Genomewide Bootstrap and Single-SNP Bootstrap Estimates for True Positive SNPs (significance threshold  $P < 5 \times 10^{-5}$ )

Figure S9: Simulation Study 2 Genomewide Bootstrap Estimates for True Positive SNPs (significance threshold  $P < 0.01$ )

Figure S10: Simulation Study 2 Genomewide Bootstrap Estimates for False Positive SNPs (significance threshold  $P < 0.01$ )

Figure S11: Simulation Study 3 Genomewide Bootstrap Estimates for True Positive SNPs (significance threshold  $P < 5 \times 10^{-5}$ )

Figure S12: Simulation Study 3 Genomewide Bootstrap Estimates for False Positive SNPs (significance threshold  $P < 5 \times 10^{-5}$ )

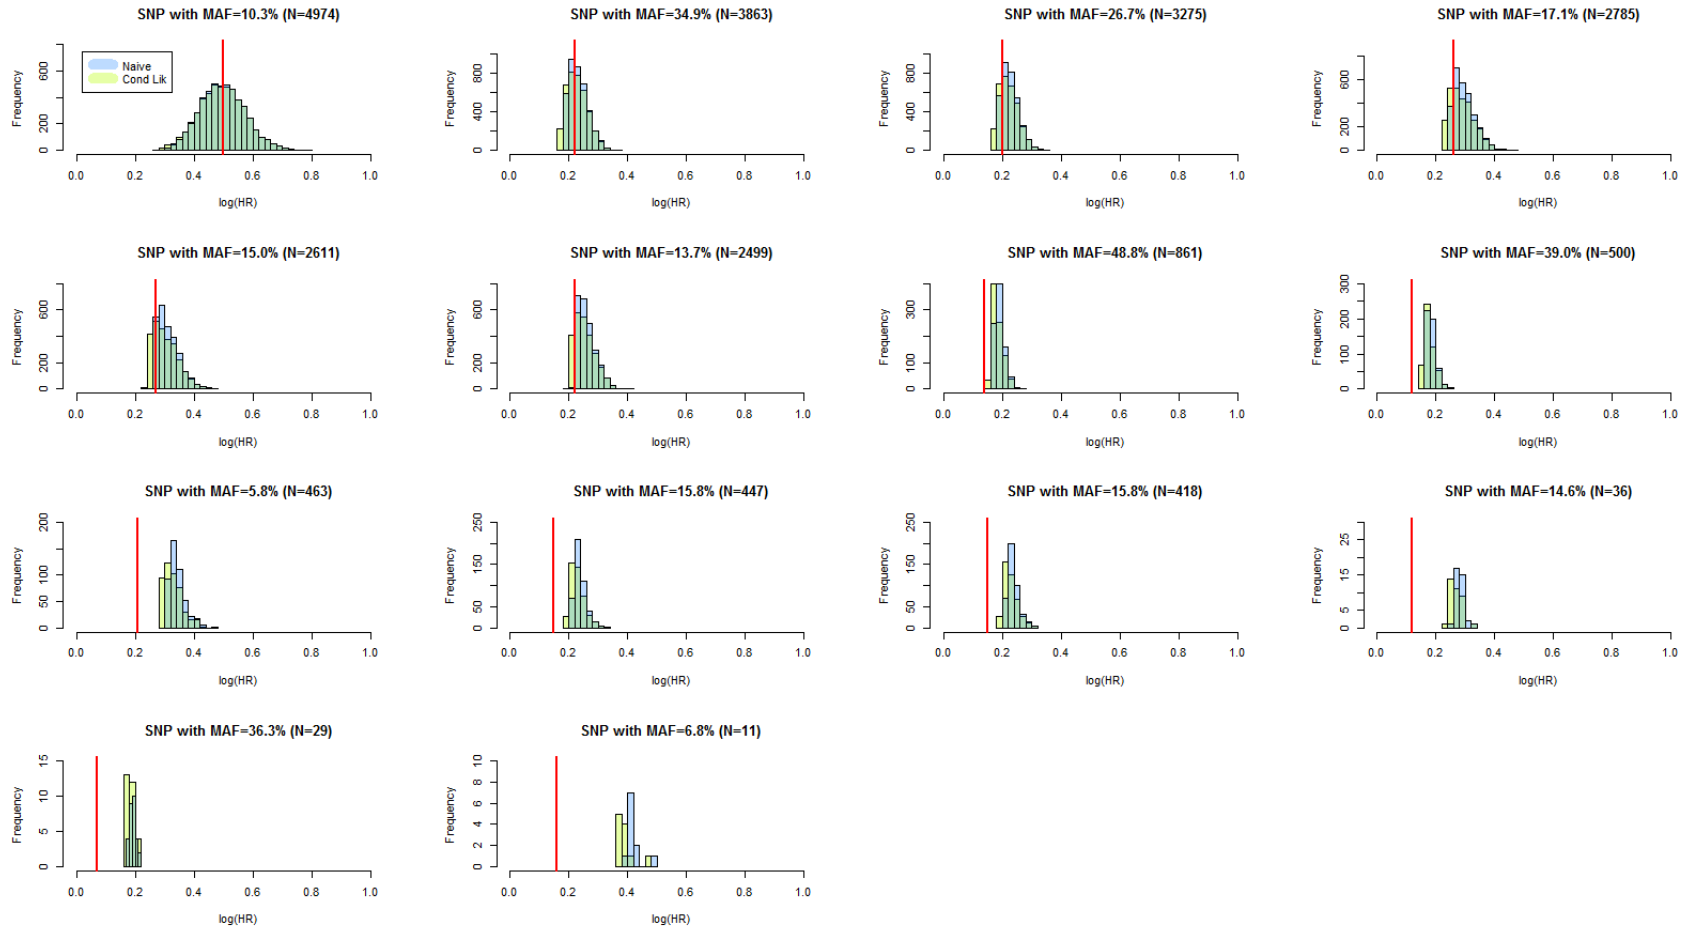

**Figure S3: Simulation Study 1 Conditional Likelihood Estimates for True Positive SNPs (significance threshold  $P < 5 \times 10^{-5}$ )**  
 Comparison of distributions of *conditional likelihood* (transparent yellow Cond Lik) and uncorrected *naive* (transparent blue) logHR estimates of true positive SNPs with  $MAF \geq 5\%$  out of the 5000 replications of a sample of 5444 subjects. The vertical solid red line denotes the fitted logHR averaged across unselected datasets. The SNPs are ordered by number of simulation datasets (N) in which the SNP was detected as statistically significant (see Table S2).

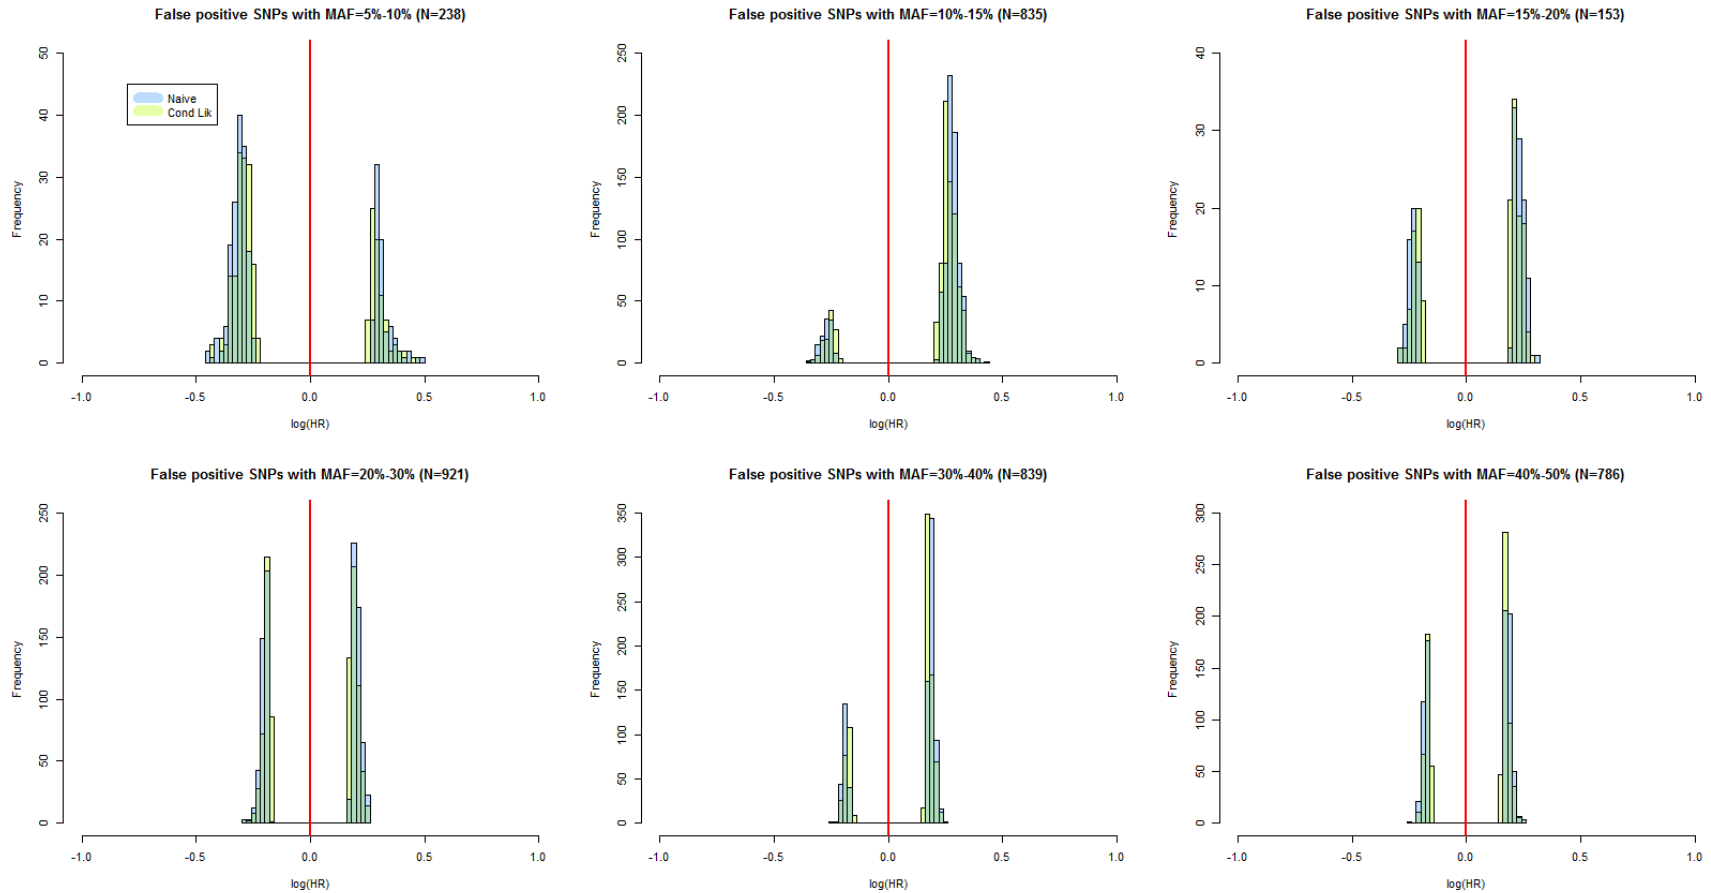

**Figure S4: Simulation Study 1 Conditional Likelihood Estimates for False Positive SNPs (significance threshold  $P < 5 \times 10^{-5}$ )**  
 Comparison of distributions of *conditional likelihood* (transparent yellow Cond Lik) and uncorrected *naive* (transparent blue) logHR estimates of false positive SNPs among 5000 replications of a sample of 5444 subjects, stratified by MAF categories. False positive SNPs are those found to be statistically significant and not in the same gene as any of the SNPs in the model used for data generation. The vertical solid red line denotes the null reference value.



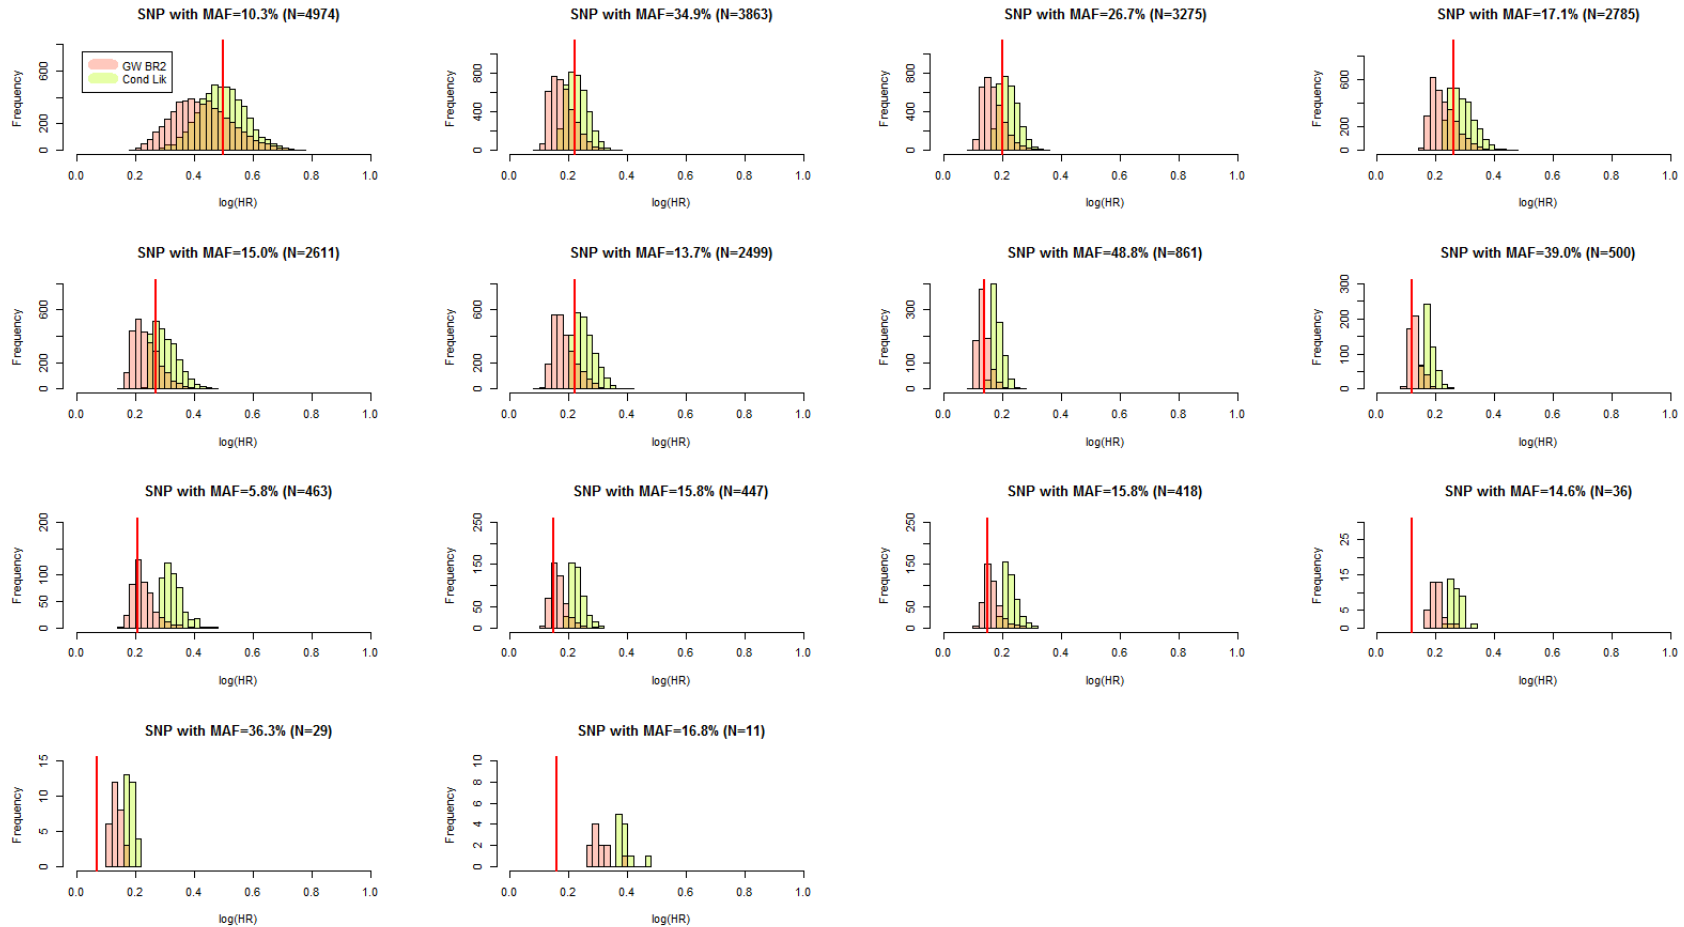

**Figure S5: Simulation Study 1 Genomewide Bootstrap and Conditional Likelihood Estimates for True Positive SNPs (significance threshold  $P < 5 \times 10^{-5}$ )** Comparison of distributions of *genome-wide bootstrap* (transparent red GW BR2) and *conditional likelihood* (transparent yellow Cond Lik) logHR estimates of true positive SNPs with MAF  $\geq 5\%$  out of the 5000 replications of a sample of 5444 subjects. The vertical solid red line denotes the fitted logHR averaged across unselected datasets. The SNPs are ordered by number of simulation datasets (N) in which the SNP was detected as statistically significant (see Tables 2, S1, S2).

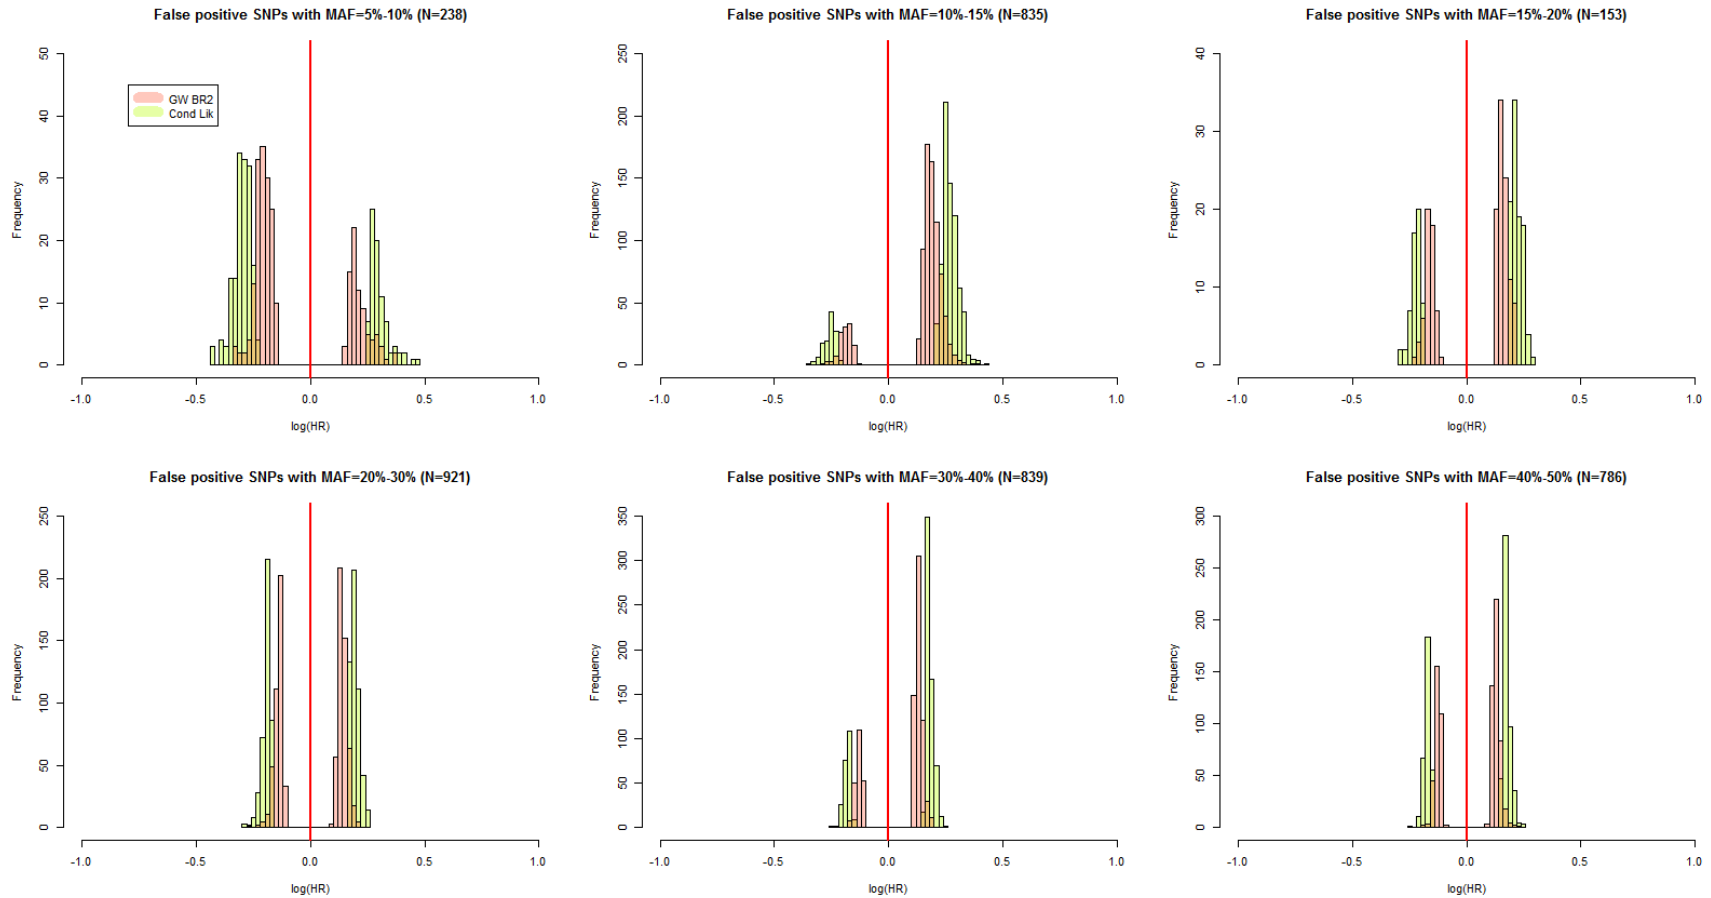

**Figure S6: Simulation Study 1 Genomewide Bootstrap and Conditional Likelihood Estimates for False Positive SNPs** (significance threshold  $P < 5 \times 10^{-5}$ ) Comparison of distributions of *genome-wide bootstrap* (transparent red GW BR2) and *conditional likelihood* (transparent yellow Cond Lik) logHR estimates of false positive SNPs among 5000 replications of a sample of 5444 subjects, stratified by MAF categories. False positive SNPs are those found to be statistically significant and not in the same gene as any of the SNPs in the model used for data generation. The vertical solid red line denotes the null reference value.

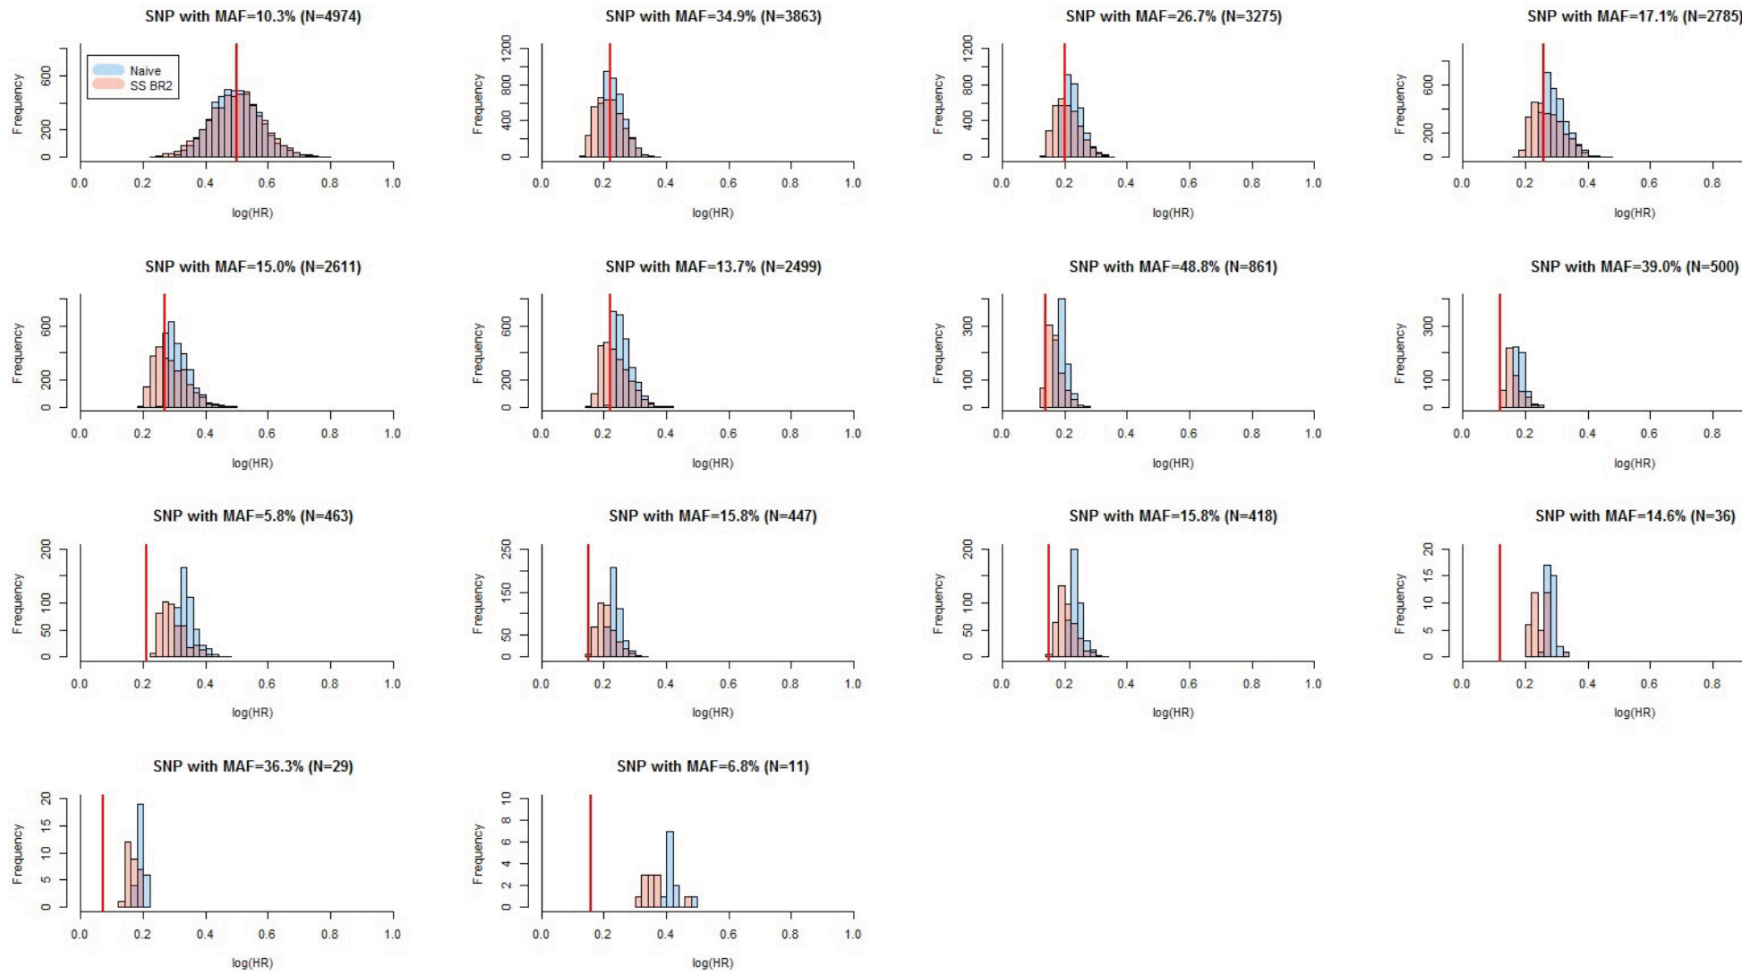

**Figure S7: Simulation Study 1 Single-SNP Bootstrap Estimates for True Positive SNPs (significant threshold  $P < 5 \times 10^{-5}$ ).** Comparison of distributions of *single-SNP bootstrap* (transparent red SS BR2) and uncorrected *naïve* (transparent blue) logHR estimates of true positive SNPs with  $MAF \geq 5\%$  out of 5000 replications in a sample of 5444 subjects. The vertical solid red line denotes the fitted logHR averaged across unselected datasets. The SNPs are ordered by number of simulation datasets (N) in which the SNP was detected as statistically significant (see Table 2).

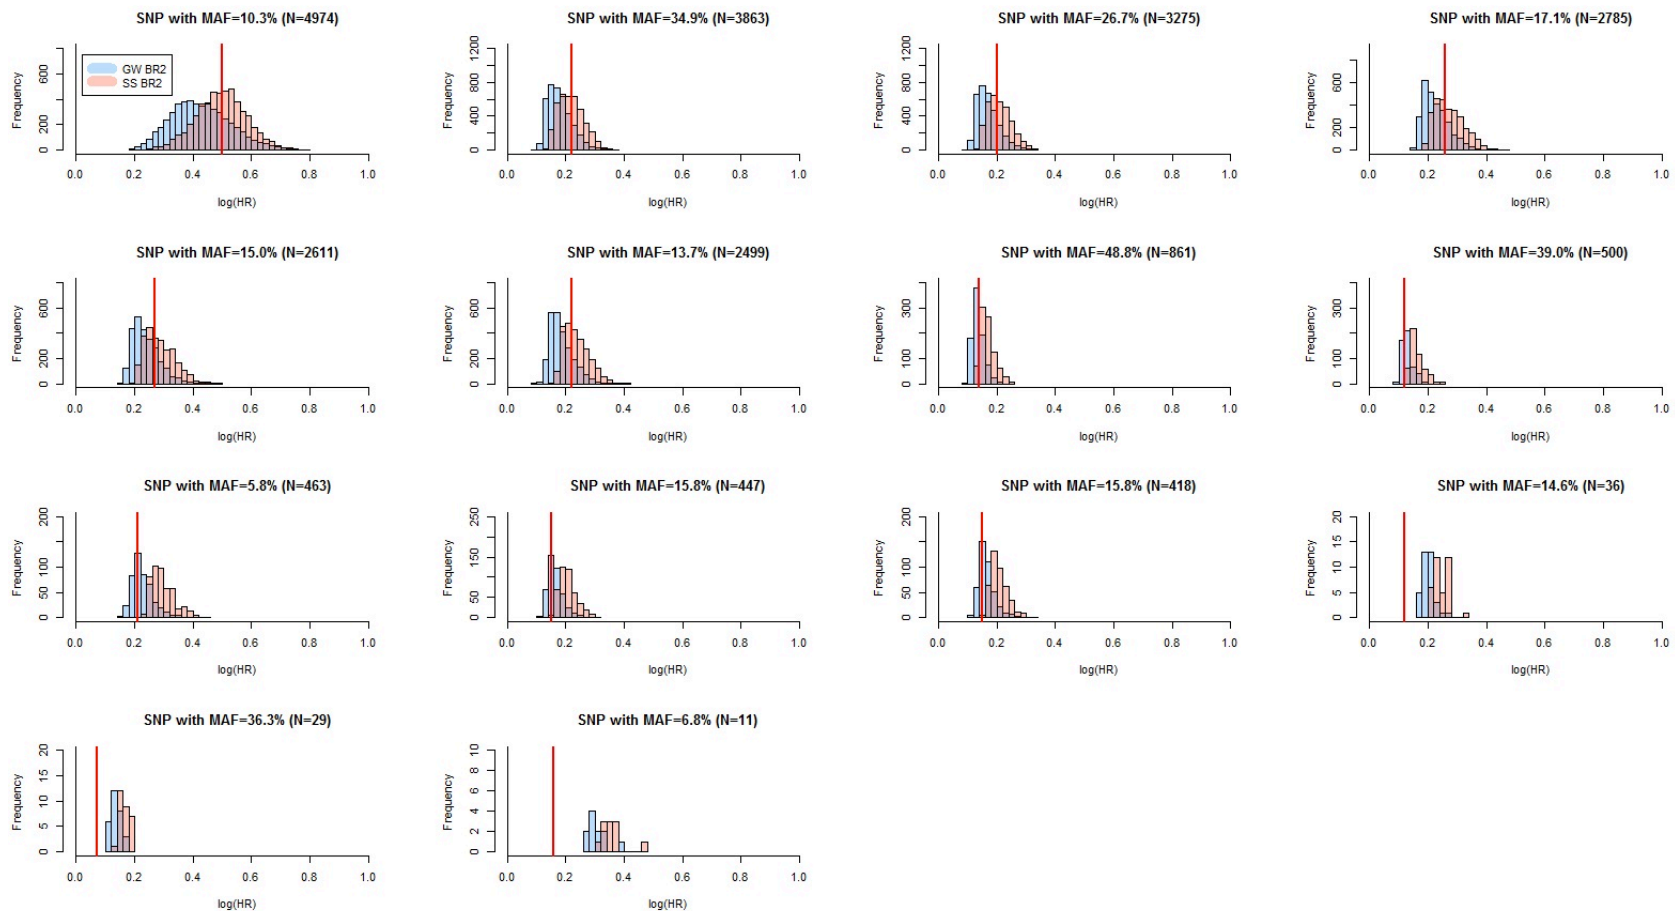

**Figure S8: Simulation Study 1 Genomewide Bootstrap and Single-SNP Bootstrap Estimates for True Positive SNPs (significance threshold  $P < 5 \times 10^{-5}$ )** Comparison of distributions of *genome-wide bootstrap* (transparent blue MS BR2) and *single-SNP bootstrap* (transparent red SS BR2) logHR estimates of true positive SNPs with MAF  $\geq 5\%$  out of 5000 replications of a sample of 5444 subjects. The vertical solid red line denotes the fitted logHR averaged across unselected datasets. The SNPs are ordered by number of simulation datasets (N) in which the SNP was detected as statistically significant (see Tables 2, S1, S3).

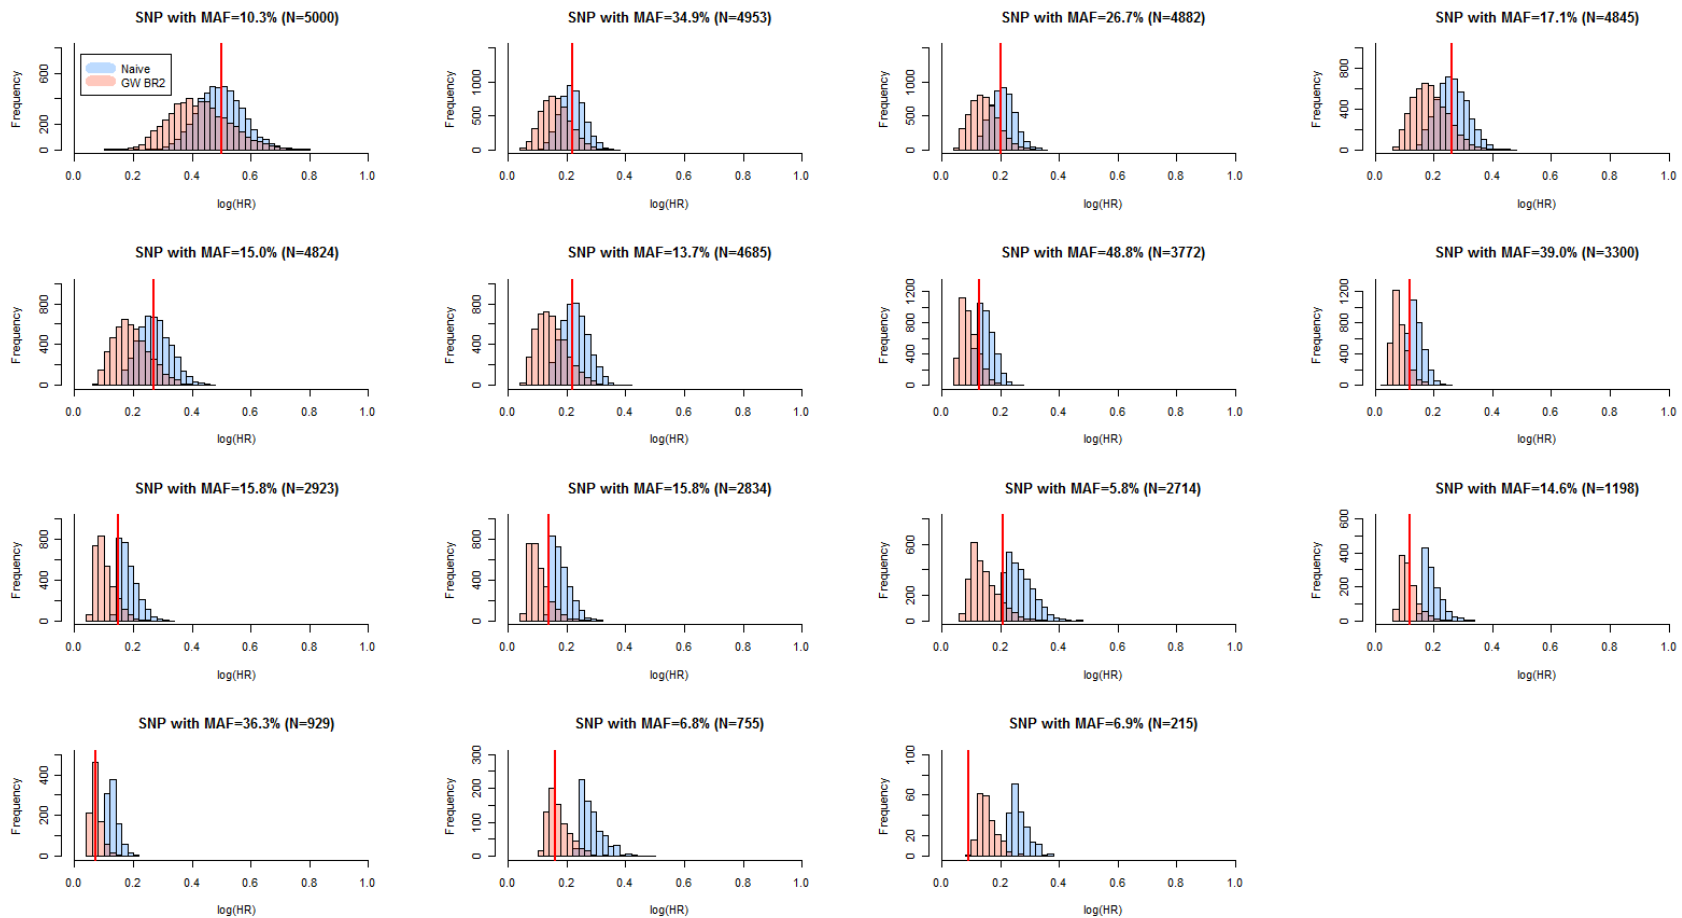

**Figure S9: Simulation Study 2 Genomewide Bootstrap Estimates for True Positive SNPs (significance threshold  $P < 0.01$ )** Comparison of distributions of *genome-wide bootstrap* (transparent red GW BR2) and uncorrected *naïve* (transparent blue) logHR estimates of true positive SNPs with MAF  $\geq 5\%$  out of the 5000 replications of a sample of 5444 subjects. The vertical, solid red line denotes the fitted logHR averaged across unselected datasets. The SNPs are ordered by number of simulation datasets (N) in which the SNP was detected as statistically significant (see Table S4).

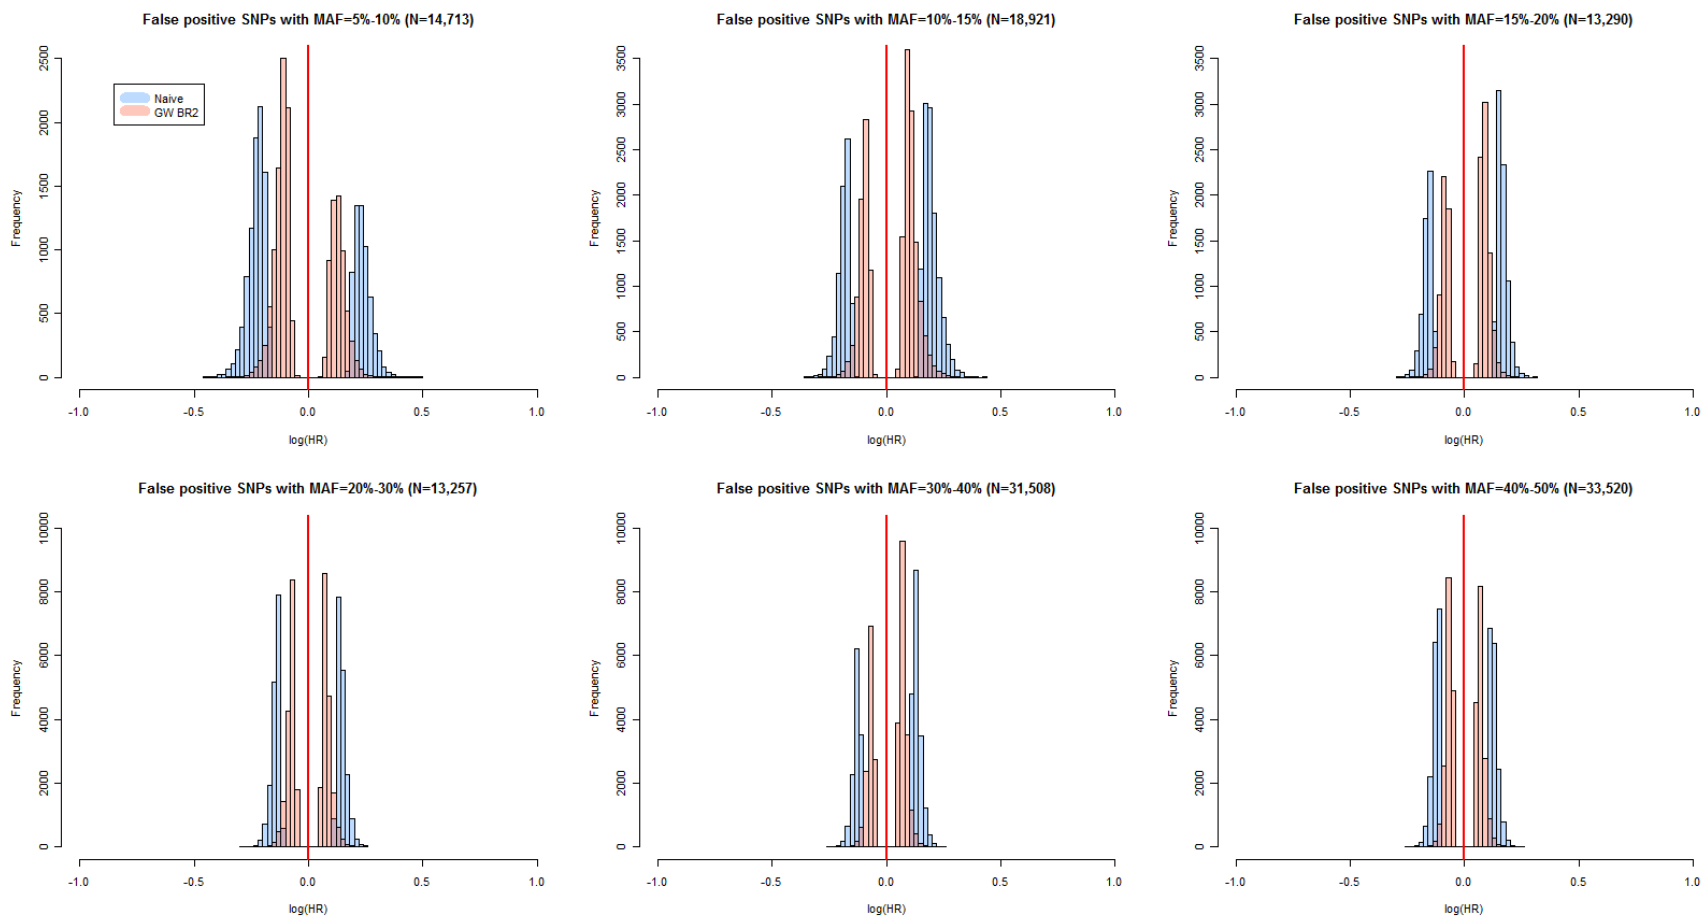

**Figure S10: Simulation Study 2 Genomewide Bootstrap Estimates for False Positive SNPs (significance threshold  $P < 0.01$ )**  
 Comparison of distributions of *genome-wide bootstrap* (transparent red GW BR2) and uncorrected *naïve* (transparent blue) logHR estimates of false positive SNPs in a sample of 5444 subjects, stratified by MAF categories. False positive SNPs are those found to be statistically significant among 5000 replications and not in the same gene as any of the SNPs in the model used for data generation. The vertical solid red line denotes the null reference value.

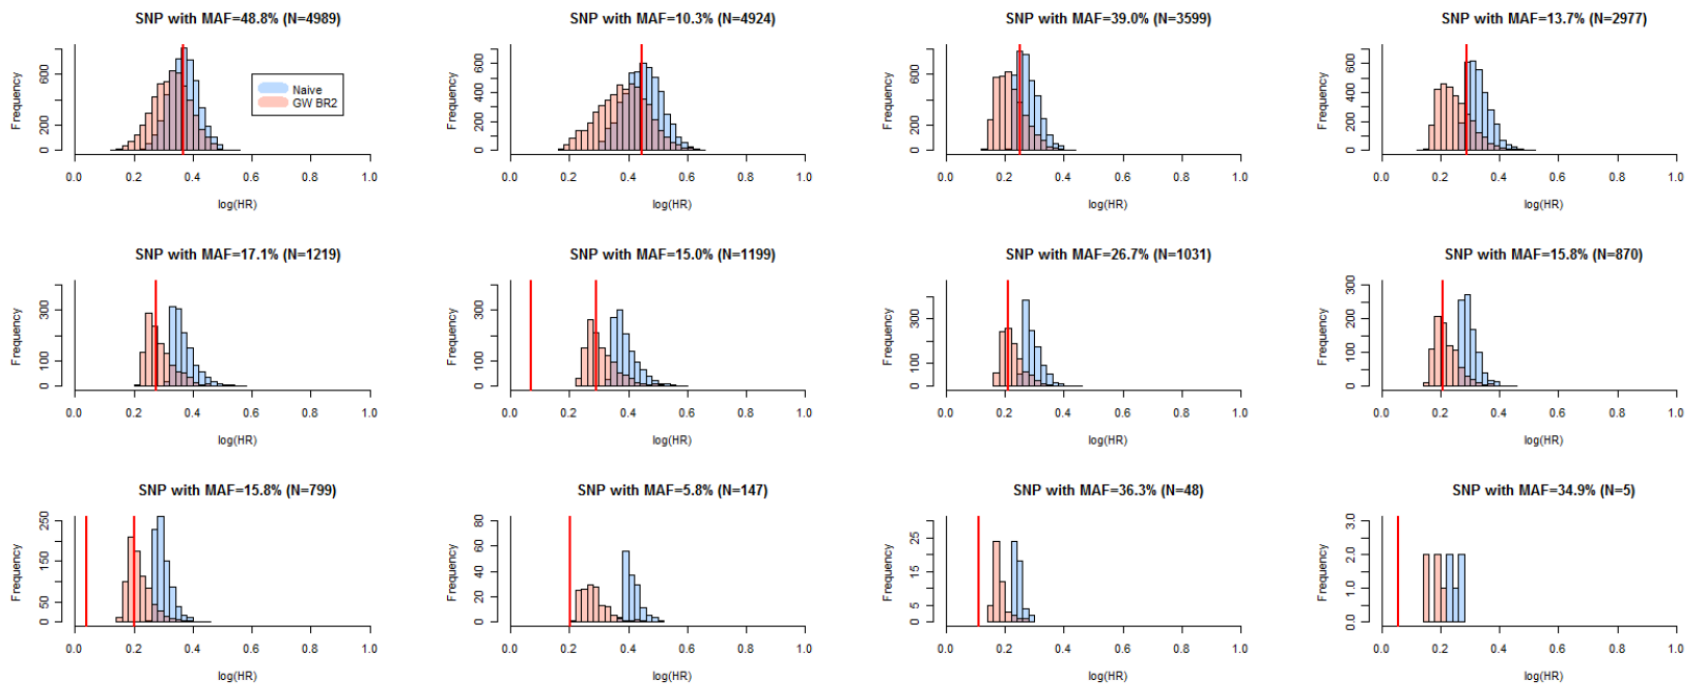

**Figure S11: Simulation Study 3 Genomewide Bootstrap Estimates for True Positive SNPs (significance threshold  $P < 5 \times 10^{-5}$ )**  
 Comparison of distributions of *genome-wide bootstrap* (transparent red GW BR2) and uncorrected *naive* (transparent blue) logHR estimates of true positive SNPs with  $MAF \geq 5\%$  out of the 5000 replications of a sample of 5444 subjects. The vertical, solid red line denotes the fitted logHR averaged across unselected datasets. The SNPs are ordered by number of simulation datasets (N) in which the SNP was detected as statistically significant (see Table S5).

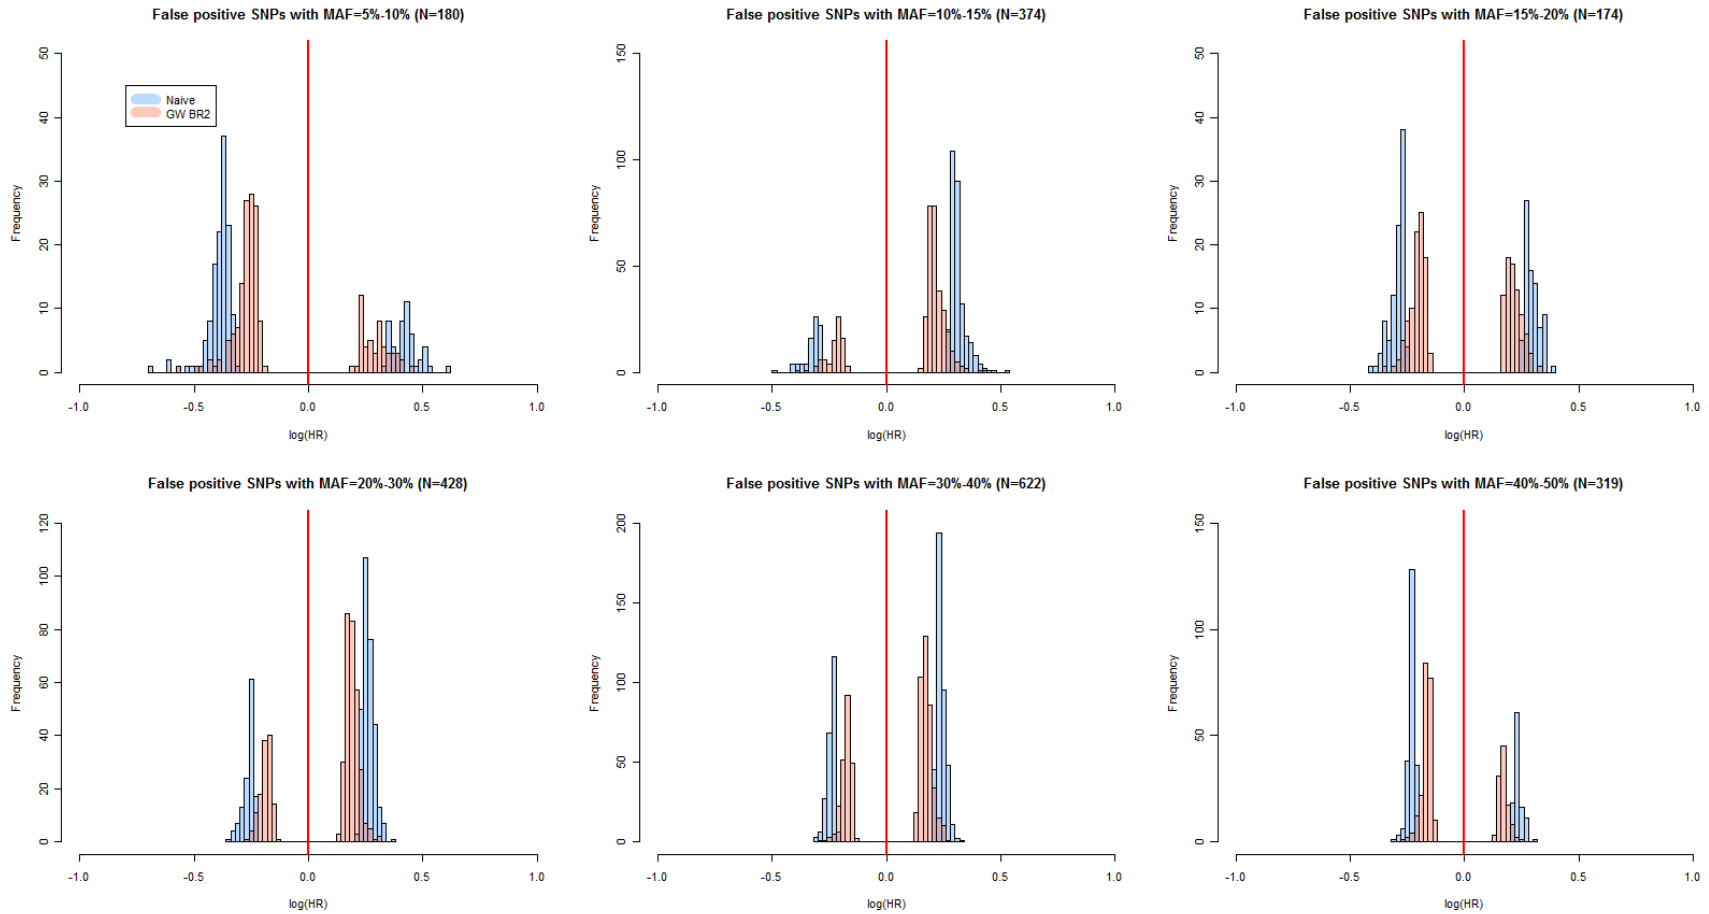

**Figure S12: Simulation Study 3 Genomewide Bootstrap Estimates for False Positive SNPs (significance threshold  $P < 5 \times 10^{-5}$ )** Comparison of distributions of *genome-wide bootstrap* (transparent red GW BR2) and uncorrected *naïve* (transparent blue) logHR estimates of false positive SNPs in a sample of 5444, stratified by MAF categories. False positive SNPs are those found to be statistically significant among 5000 replications and not in the same gene as any of the SNPs in the model used for data generation. The vertical solid red line denotes the null reference value.
